# Supplementary material
Source: MDPI journal article supplement (https://www.mdpi.com/2073-4441/11/1/41)
Supplement: s1 [file s1]

# Atmospheric Rivers Over the Arctic: Lagrangian Characterisation of Their Moisture Sources

Marta Vázquez <sup>1,\*</sup>, Iago Algarra <sup>1</sup>, Jorge Eiras-Barca <sup>1</sup>, Alexandre M. Ramos <sup>2</sup>, Raquel Nieto <sup>1</sup> and Luis Gimeno <sup>1</sup>

<sup>1</sup> Environmental Physics Laboratory (EPhysLab), Facultade de Ciencias, Universidade de Vigo, Ourense 32004, Spain

<sup>2</sup> Instituto Dom Luiz, Universidade de Lisboa, 1749-016 Lisboa, Portugal

\* Correspondence: martavazquez@uvigo.es

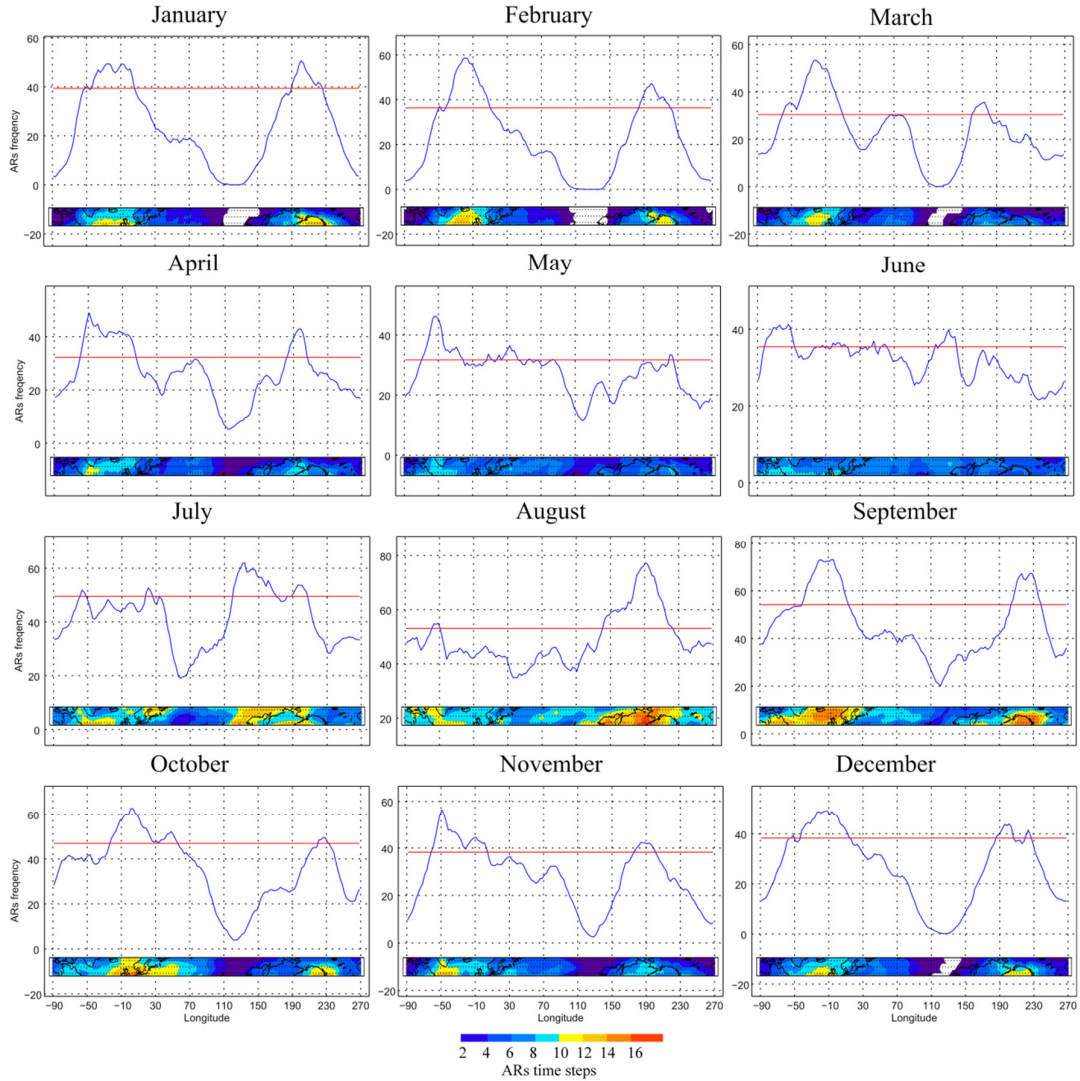

**Figure S1.** AR frequency over the area between 55° and 65° N over the period 1997–2014: The blue line represents the number of ARs for every longitude and the box embedded in the plot shows the spatial distribution of the ARs. Reddish colours represent areas with higher AR frequency and bluish colours those with lower. The red lines depict the 75th percentile of the distribution.
